# Supplementary material
Source: PubMed Central journal article supplement (PMC10524668)
Supplement: NIHMS1904753-supplement-1.pdf [file NIHMS1904753-supplement-1.pdf]

Supplemental Table 1: Characteristics of Fox Insight participants who were not represented within the virtual census (n=1500)

|                       |                                     |              |
|-----------------------|-------------------------------------|--------------|
| Age                   |                                     |              |
|                       | <65                                 | 1015 (67.7%) |
|                       | 65-74                               | 441 (29.4%)  |
|                       | >=75                                | 44 (2.9%)    |
| Gender                |                                     |              |
|                       | Male                                | 542 (36.1%)  |
|                       | Female                              | 958 (63.9%)  |
| Race/ethnicity        |                                     |              |
|                       | White                               | 1032 (68.8%) |
|                       | Black                               | 39 (2.6%)    |
|                       | Other                               | 429 (28.6%)  |
| Census division       |                                     |              |
|                       | Northeast                           | 7 (0.5%)     |
|                       | Mid-Atlantic                        | 219 (14.6%)  |
|                       | East North Central                  | 197 (13.1%)  |
|                       | West North Central                  | 28 (1.9%)    |
|                       | South Atlantic                      | 157 (10.5%)  |
|                       | East South Central                  | 22 (1.5%)    |
|                       | West South Central                  | 66 (4.4%)    |
|                       | Mountain                            | 77 (5.1%)    |
|                       | Pacific                             | 727 (48.5%)  |
| Rural/urban residence |                                     |              |
|                       | Non-metropolitan                    | 54 (3.6%)    |
|                       | Metropolitan                        | 1446 (96.4%) |
| Education             |                                     |              |
|                       | Less than high school               | 0 (0.0%)     |
|                       | High school/some college            | 38 (2.5%)    |
|                       | Bachelor/associate degree           | 868 (57.9%)  |
|                       | Master/professional/doctoral degree | 594 (39.6%)  |
| PD severity           |                                     |              |
|                       | Mild                                | 1303 (86.9%) |
|                       | Moderate                            | 170 (11.3%)  |
|                       | Severe                              | 27 (1.8%)    |

Supplemental Table 2: Standardized differences between the inverse probability weighted Fox Insight cohort and virtual PD census

|                       | Virtual census (not in FI)<br>(n=827023) | Before inverse probability of participation weighting |                         | After inverse probability of participation weighting |                         |
|-----------------------|------------------------------------------|-------------------------------------------------------|-------------------------|------------------------------------------------------|-------------------------|
|                       |                                          | Fox Insight<br>(n=22465)                              | Standardized difference | Fox Insight<br>(n=22243)                             | Standardized difference |
| Age                   |                                          |                                                       | 0.94                    |                                                      | 0.17                    |
| <65                   | 110201<br>(13.3%)                        | 8479<br>(37.7%)                                       |                         | 4119<br>(18.5%)                                      |                         |
| 65-74                 | 228286<br>(27.6%)                        | 9735<br>(43.3%)                                       |                         | 5988<br>(26.9%)                                      |                         |
| >=75                  | 488536<br>(59.1%)                        | 4251<br>(18.9%)                                       |                         | 12136<br>(54.6%)                                     |                         |
| Gender                |                                          |                                                       | -0.02                   |                                                      | -0.17                   |
| Male                  | 458772<br>(55.5%)                        | 12720<br>(56.6%)                                      |                         | 14232<br>(64.0%)                                     |                         |
| Female                | 368251<br>(44.5%)                        | 9745<br>(43.4%)                                       |                         | 8011<br>(36.0%)                                      |                         |
| Race/ethnicity        |                                          |                                                       | 0.31                    |                                                      | 0.21                    |
| White                 | 716049<br>(86.6%)                        | 21303<br>(94.8%)                                      |                         | 20560<br>(92.4%)                                     |                         |
| Black                 | 45755<br>(5.5%)                          | 148<br>(0.7%)                                         |                         | 437<br>(2.0%)                                        |                         |
| Other                 | 65219<br>(7.9%)                          | 1014<br>(4.5%)                                        |                         | 1246<br>(5.6%)                                       |                         |
| Census division       |                                          |                                                       | 0.60                    |                                                      | 0.21                    |
| Northeast             | 138650<br>(16.8%)                        | 1518<br>(6.8%)                                        |                         | 2445<br>(11.0%)                                      |                         |
| Mid-Atlantic          | 75119<br>(9.1%)                          | 2943<br>(13.1%)                                       |                         | 2108<br>(9.5%)                                       |                         |
| East North Central    | 83355<br>(10.1%)                         | 3154<br>(14.0%)                                       |                         | 2539<br>(11.4%)                                      |                         |
| West North Central    | 73906<br>(8.9%)                          | 1432<br>(6.4%)                                        |                         | 1856<br>(8.3%)                                       |                         |
| South Atlantic        | 194679<br>(23.5%)                        | 4722<br>(21.0%)                                       |                         | 25569<br>(25.0%)                                     |                         |
| East South Central    | 45264<br>(5.5%)                          | 993<br>(4.4%)                                         |                         | 1468<br>(6.6%)                                       |                         |
| West South Central    | 112723<br>(13.6%)                        | 1993<br>(8.9%)                                        |                         | 3284<br>(14.8%)                                      |                         |
| Mountain              | 64794<br>(7.8%)                          | 2183<br>(9.7%)                                        |                         | 1700<br>(7.6%)                                       |                         |
| Pacific               | 38533<br>(4.7%)                          | 3527<br>(15.7%)                                       |                         | 1274<br>(5.7%)                                       |                         |
| Rural/urban residence |                                          |                                                       | 0.19                    |                                                      | -0.12                   |
| Non-metropolitan      | 158056<br>(19.1%)                        | 2750<br>(12.2%)                                       |                         | 5380<br>(24.2%)                                      |                         |
| Metropolitan          | 668968                                   | 19715                                                 |                         | 16863                                                |                         |

|                                     |                   |                  |      |                  |      |
|-------------------------------------|-------------------|------------------|------|------------------|------|
|                                     | (80.9%)           | (87.8%)          |      | (75.8%)          |      |
| Education                           |                   |                  | 1.04 |                  | 0.60 |
| Less than high school               | 200563<br>(24.3%) | 155<br>(0.7%)    |      | 898<br>(4.0%)    |      |
| High school/some college            | 392611<br>(47.5%) | 6496<br>(28.9%)  |      | 13516<br>(60.8%) |      |
| Bachelor/associate degree           | 126114<br>(15.3%) | 8153<br>(36.3%)  |      | 3997<br>(18.0%)  |      |
| Master/professional/doctoral degree | 107735<br>(13.0%) | 7661<br>(34.1%)  |      | 3832<br>(17.2%)  |      |
| PD severity                         |                   |                  | 0.75 |                  | 0.18 |
| Mild                                | 219671<br>(26.6%) | 11607<br>(51.7%) |      | 4909<br>(22.1%)  |      |
| Moderate                            | 346307<br>(41.9%) | 9521<br>(42.4%)  |      | 11260<br>(50.6%) |      |
| Severe                              | 261045<br>(31.6%) | 1337<br>(6.0%)   |      | 6074<br>(27.3%)  |      |
